# Supplementary material for: Mucin O-glycans facilitate symbiosynthesis to maintain gut immune homeostasis
Source: PubMed Central journal article supplement — eBioMedicine. 2019 Sep 11;48:513–25. doi: 10.1016/j.ebiom.2019.09.008 (PMC6838389; doi:10.1016/j.ebiom.2019.09.008), 2019-09-11
Supplement: mmc1.pdf [file mmc1.pdf]

## Supplementary Table 1

| Ulcerative colitis (n=49) |            |
|---------------------------|------------|
| Site of disease           |            |
| Total (%)                 | 22 (44.9%) |
| Rectal (%)                | 8 (16.3%)  |
| Left (%)                  | 19 (38.8%) |
| Matts Endoscopy Score     |            |
| 1                         | 24 (49.0%) |
| 2                         | 14 (28.6%) |
| 3                         | 6 (12.2%)  |
| 4                         | 5 (10.2%)  |
| Clinical Activity Index   |            |
| 0 – 3                     | 38 (22.4%) |
| 4 ≤                       | 11 (77.6%) |
| UC Drugs                  |            |
| Anti-TNF antibody         | 1 (2.0%)   |
| Immunosuppressant         | 11 (22.4%) |
| Prodrug of 5-ASA          | 34 (69.4%) |
| PPI                       | 7 (14.3%)  |
| Steroid                   | 7 (14.3%)  |
| Probiotics                | 40 (81.6%) |

### Supplementary Table 1. UC patient information (Study 1).

The number and ratio of patients with different lesion sites, disease severity score, or drug treatments.

## Supplementary Table 2

| Crohn's Disease (n = 40) |             |
|--------------------------|-------------|
| Site of disease          |             |
| Small Intestine (%)      | 13 (32.5 %) |
| Colon (%)                | 4 (10 %)    |
| Both (%)                 | 23 (57.5 %) |
| Modified Rutgeerts score |             |
| 0-1 (remission)          | 12 (30 %)   |
| 2-4 (active)             | 28 (70 %)   |
| CDAI                     |             |
| <150                     | 30 (75 %)   |
| 150 – 220                | 6 (15 %)    |
| 220 – 300                | 2 (5 %)     |
| 300<                     | 2 (5 %)     |
| CD Drugs                 |             |
| Anti-TNF antibody        | 23 (57.5 %) |
| Immunosuppressant        | 13 (32.5 %) |
| Prodrug of 5-ASA         | 34 (85.0%)  |
| PPI                      | 1 (2.5 %)   |
| Antibiotics              | 2 (5.0 %)   |
| Probiotics               | 27 (67.5 %) |

### Supplementary Table 2. CD patient information (Study 1).

The number and ratio of patients with different lesion sites, disease severity score, or drug treatments.

## Supplementary Table 3

|         | Sia       | Gal        | Fuc        | GlcNAc     | GalNAc     | Man       | Ara        | Rib       | Xyl        | Rha   |
|---------|-----------|------------|------------|------------|------------|-----------|------------|-----------|------------|-------|
| mol%    |           |            |            |            |            |           |            |           |            |       |
| Healthy | 2.4 ± 1.1 | 24.1 ± 2.8 | 4.4 ± 0.9  | 28 ± 4.9   | 11.4 ± 2.5 | 1.0 ± 1.0 | 11.7 ± 2.5 | 4.1 ± 4.1 | 13.0 ± 3.3 | 0 ± 0 |
| UC      | 1.7 ± 0.5 | 31.4 ± 6.4 | 16.6 ± 8.3 | 18.4 ± 1.9 | 7.8 ± 1.6  | 5.0 ± 3.3 | 8.3 ± 2.5  | 0 ± 0     | 10.7 ± 2.1 | 0 ± 0 |

### Supplementary Table 3. Sugar compositions in stool glycans of Healthy subjects and UC patients.

Sugar compositions in stool glycans of healthy subjects and UC patients. Data represent the mean ± standard deviation (n = 3/group).

## Supplementary Table 4

| Organic acids      | Healthy<br>( <i>n</i> = 43) | UC                         |                               | CD                         |                               |
|--------------------|-----------------------------|----------------------------|-------------------------------|----------------------------|-------------------------------|
|                    |                             | Active<br>( <i>n</i> = 25) | Remission<br>( <i>n</i> = 24) | Active<br>( <i>n</i> = 10) | Remission<br>( <i>n</i> = 30) |
| Acetate            | 43 (100%)                   | 25 (100%)                  | 24 (100%)                     | 10 (100%)                  | 10 (100%)                     |
| Propionate         | 43 (100%)                   | 47 (96%)                   | 24 (100%)                     | 8 (80%)                    | 10 (100%)                     |
| <i>n</i> -Butyrate | 43 (100%)                   | 16 (64%)                   | 20 (83%)                      | 5 (50%)                    | 24 (80%)                      |
| Lactate            | 6 (14%)                     | 5 (20%)                    | 5 (21%)                       | 3 (30%)                    | 5 (17%)                       |
| Succinate          | 30 (70%)                    | 11 (44%)                   | 11 (46%)                      | 4 (40%)                    | 14 (47%)                      |
| <i>i</i> -Valerate | 9 (21%)                     | 6 (12%)                    | 2 (8.3%)                      | 2 (20%)                    | 7 (23.3%)                     |
| <i>n</i> -Valerate | 7 (16%)                     | 0 (0%)                     | 0 (0%)                        | 1 (10%)                    | 2 (6.7%)                      |
| <i>i</i> -Butyrate | 1 (2.3%)                    | 0 (0%)                     | 2 (8.3%)                      | 0 (0%)                     | 2 (6.7%)                      |
| Formate            | 5 (12%)                     | 3 (12%)                    | 1 (4.2%)                      | 2 (20%)                    | 1 (3.3%)                      |

**Supplementary Table 4. Frequency of the subjects with fecal organic acids below detection limits (Study 1).**

Data represents the proportions of the subjects in whom respective organic acids were detected.

IBD patients were classified by endoscopic assessment.

## Supplementary Table 5

|                   | Total      | Left        | Rectal                  | <i>p</i> value |
|-------------------|------------|-------------|-------------------------|----------------|
| Site of disease   | 8.42±10.0  | 8.28±8.65   | 10.2±11.4               | 0.89 (ANOVA)   |
|                   | Treated    | Untreated   | <i>p</i> value          |                |
| Immunosuppressant | 5.73±8.06  | 9.48±9.87   | 0.26 (Student's t test) |                |
| Prodrug of 5-ASA  | 8.21±8.89  | 12.44±14.96 | 0.35 (Student's t test) |                |
| PPI               | 10.83±9.62 | 8.27±9.60   | 0.52 (Student's t test) |                |
| Steroid           | 4.96±10.49 | 9.25±9.37   | 0.28 (Student's t test) |                |
| Probiotics        | 8.39±10.12 | 10.51±5.89  | 0.71 (Student's t test) |                |

**Supplementary Table 5. Effects of lesion site and drug treatment on fecal *n*-butyrate levels in UC patients (Study 1).**

Data represents the mean ± SD of fecal *n*-butyrate levels (μmol/g) and the *p* value of UC patients with different lesion sites or drug treatments.

## Supplementary Table 6

|                   | Small Intestine | Colon     | Both                    | <i>p</i> value        |
|-------------------|-----------------|-----------|-------------------------|-----------------------|
| Site of disease   | 8.42±10.0       | 8.28±8.65 | 10.2±11.4               | 0.62 (Kruskal-Wallis) |
|                   | Treated         | Untreated | <i>p</i> value          |                       |
| Anti-TNF          | 5.30±4.84       | 5.11±4.52 | 0.90 (Student's t test) |                       |
| Immunosuppressant | 6.04±5.08       | 4.82±4.47 | 0.45 (Student's t test) |                       |
| Prodrug of 5-ASA  | 5.26±4.52       | 4.98±5.76 | 0.90 (Student's t test) |                       |
| PPI               | 2.80±1.11       | 5.41±4.77 | 0.52 (Student's t test) |                       |
| Probiotics        | 5.70±5.20       | 4.22±3.17 | 0.35 (Student's t test) |                       |

**Supplementary Table 6. Effects of lesion site and drug treatment on fecal *n*-butyrate levels in CD patients (Study 1).**

Data represents the mean ± SD of fecal *n*-butyrate levels (μmol/g) and the *p* value of CD patients with different lesion sites or drug treatments.

## Supplementary Table 7

### *n*-Butyrate

| Bacterial genera               | rho  | FDR      | Abundance in healthy subjects (%) |
|--------------------------------|------|----------|-----------------------------------|
| <i>Haemophilus</i>             | 0.55 | 0.000028 | 0.18                              |
| <b><i>Faecalibacterium</i></b> | 0.53 | 0.000029 | 11.81                             |
| <b><i>Eubacterium</i></b>      | 0.51 | 0.000056 | 7.62                              |
| <i>Roseburia</i>               | 0.45 | 0.0010   | 0.79                              |
| <i>Coprobacter</i>             | 0.42 | 0.0031   | 0.03                              |
| <b><i>Anaerostipes</i></b>     | 0.39 | 0.0066   | 1.79                              |
| <i>Eggerthella</i>             | 0.35 | 0.022    | 0.33                              |
| <i>Turicibacter</i>            | 0.34 | 0.029    | 0.05                              |
| <i>Parasutterella</i>          | 0.34 | 0.029    | 0.39                              |
| <i>Dorea</i>                   | 0.33 | 0.029    | 0.63                              |
| <b><i>Ruminococcus</i></b>     | 0.32 | 0.041    | 4.16                              |
| <b><i>Gemmiger</i></b>         | 0.32 | 0.041    | 2.67                              |

### Acetate

| Bacterial genera   | rho  | FDR    | Abundance in healthy subjects (%) |
|--------------------|------|--------|-----------------------------------|
| <i>Proteus</i>     | 0.46 | 0.0022 | 0.0017                            |
| <i>Coprobacter</i> | 0.44 | 0.0022 | 0.03                              |
| <i>Haemophilus</i> | 0.44 | 0.0022 | 0.18                              |

### *n*-Valerate

| Bacterial genera    | rho  | FDR   | Abundance in healthy subjects (%) |
|---------------------|------|-------|-----------------------------------|
| <i>Faecalitalea</i> | 0.39 | 0.042 | 0.026                             |

### *i*-Butyrate

| Bacterial genera | rho  | FDR   | Abundance in healthy subjects (%) |
|------------------|------|-------|-----------------------------------|
| <i>Bacillus</i>  | 0.39 | 0.049 | 0.0078                            |

### Supplementary Table 7. Summary of bacterial genera associated with fecal organic acid levels (Study 1).

Data represent the Spearman's correlation coefficients, *p* values with Benjamini-Hochberg correction (FDR), and average bacterial abundance of healthy subjects (%). Bacteria abundant (more than 1 %) in the healthy subjects are shown in bold.

# Supplementary Table 8

## *n*-Butyrate

| Bacterial species                          | rho  | FDR      | Abundance in healthy subjects (%) |
|--------------------------------------------|------|----------|-----------------------------------|
| <i>Haemophilus parainfluenzae</i>          | 0.55 | 0.000037 | 0.18                              |
| <i>Eubacterium ventriosum</i>              | 0.54 | 0.000037 | 0.60                              |
| <b><i>Faecalibacterium prausnitzii</i></b> | 0.53 | 0.000044 | 11.64                             |
| <i>Ruminococcus obeum</i>                  | 0.48 | 0.00054  | 0.58                              |
| <b><i>Eubacterium rectale</i></b>          | 0.48 | 0.00056  | 2.38                              |
| <i>Faecalibacterium sp.</i>                | 0.47 | 0.00060  | 0.08                              |
| <i>Eubacterium ramulus</i>                 | 0.46 | 0.00084  | 0.29                              |
| <b><i>Eubacterium hallii</i></b>           | 0.43 | 0.0023   | 2.04                              |
| <i>Anaerostipes hadrus</i>                 | 0.42 | 0.0029   | 0.48                              |
| <i>Roseburia inulinivorans</i>             | 0.42 | 0.0030   | 0.21                              |
| <i>Coprobacter fastidiosus</i>             | 0.42 | 0.0032   | 0.03                              |
| <i>Blautia glucerasea</i>                  | 0.39 | 0.0067   | 0.25                              |
| <b><i>Anaerostipes sp.</i></b>             | 0.39 | 0.0067   | 1.28                              |
| <i>Roseburia intestinalis</i>              | 0.39 | 0.0067   | 0.43                              |
| <i>Roseburia faecis</i>                    | 0.37 | 0.014    | 0.04                              |
| <i>Haemophilus pittmaniae</i>              | 0.36 | 0.017    | 0.01                              |
| <i>Eggerthella lenta</i>                   | 0.35 | 0.020    | 0.33                              |
| <i>Phascolarctobacterium sp.</i>           | 0.35 | 0.020    | 0.25                              |
| <i>Ruminococcus gauvreauii</i>             | 0.33 | 0.027    | 0.01                              |
| <i>Clostridium xylanolyticum</i>           | 0.34 | 0.027    | 0.11                              |
| <i>Parasutterella excrementihominis</i>    | 0.34 | 0.027    | 0.39                              |
| <i>Ruminococcus faecis</i>                 | 0.34 | 0.027    | 0.89                              |
| <i>Turicibacter sanguinis</i>              | 0.34 | 0.027    | 0.05                              |
| <i>Clostridium disporicum</i>              | 0.33 | 0.028    | 0.05                              |
| <i>Blautia schinkii</i>                    | 0.32 | 0.033    | 0.19                              |
| <b><i>Ruminococcus bromii</i></b>          | 0.31 | 0.043    | 2.12                              |
| <b><i>Blautia wexlerae</i></b>             | 0.31 | 0.045    | 3.16                              |
| <b><i>Bacteroides vulgatus</i></b>         | 0.31 | 0.049    | 4.05                              |

## Acetate

| Bacterial species                 | rho  | FDR    | Abundance in healthy subjects (%) |
|-----------------------------------|------|--------|-----------------------------------|
| <i>Coprobacter fastidiosus</i>    | 0.44 | 0.0089 | 0.030                             |
| <i>Haemophilus parainfluenzae</i> | 0.43 | 0.0089 | 0.17                              |

## *n*-Valerate

| Bacterial species               | rho  | FDR     | Abundance in healthy subjects (%) |
|---------------------------------|------|---------|-----------------------------------|
| <i>Ruminococcus gauvreauii</i>  | 0.52 | 0.00035 | 0.013                             |
| <i>Eubacterium cylindroides</i> | 0.39 | 0.048   | 0.026                             |

### Supplementary Table 8. Summary of bacterial species associated with fecal organic acid levels (Study 1).

Data represent the Spearman's correlation coefficients, *p* values with Benjamini-Hochberg correction (FDR), and average bacterial abundance of healthy subjects (%). Bacteria abundant (more than 1 %) in the healthy subjects are shown in bold.



## Supplementary Table 9

| <i>O</i> -glycan components | Healthy     | UC          |             | CD          |             | <i>p</i> value        |
|-----------------------------|-------------|-------------|-------------|-------------|-------------|-----------------------|
|                             |             | Active      | Remission   | Active      | Remission   |                       |
| Sulfate                     | 0.48±0.17   | 0.46±0.22   | 0.44±0.19   | 0.56±0.20   | 0.43±0.18   | 0.72 (ANOVA)          |
| Sialic acid                 | 0.18±0.14   | 0.14±0.09   | 0.21±0.17   | 0.24±0.10   | 0.24±0.17   | 0.16 (Kruskal-Wallis) |
| NeuAc                       | 0.17±0.13   | 0.14±0.09   | 0.21±0.17   | 0.24±0.10   | 0.23±0.17   | 0.15 (ANOVA)          |
| NeuGc                       | 0.007±0.017 | 0.007±0.014 | 0.005±0.010 | 0.003±0.014 | 0.010±0.064 | 0.56 (Kruskal-Wallis) |

**Supplementary Table 9. Association between IBD and stool mucin *O*-glycan component ratio (Study 1).**

Data represent the mean  $\pm$  SD of the ratio of each mucin *O*-glycan component per mucin *O*-glycan (nmol/nmol) and the *p* values of the healthy subjects and IBD patients classified by endoscopic assessment.

## Supplementary Table 10

| Disease | Detection ratio | <i>p</i> value |
|---------|-----------------|----------------|
| Healthy | 8/38 (21%)      | -              |
| UC      | 17/38 (45%)     | 0.0497         |
| CD      | 7/25 (28%)      | 0.558          |

**Supplementary Table 10. Association between IBD and fecal NeuGc detection frequency (Study 1).**

Data represent the proportion of subjects in whom NeuGc was detected. Statistical tests were performed using Fisher's exact test by comparing with healthy subjects.

# Supplementary Table 11

| Nutrient                            | Healthy         | UC              | FDR  |
|-------------------------------------|-----------------|-----------------|------|
| Molybdenum (µg)                     | 116.7 ± 34.7    | 134.7 ± 37.7    | 0.21 |
| Copper (mg)                         | 0.88 ± 0.21     | 0.95 ± 0.22     | 0.97 |
| Manganese (mg)                      | 2.1 ± 0.6       | 2.2 ± 0.5       | 0.97 |
| Alcohol (g)                         | 12.6 ± 15.6     | 0.19 ± 0.28     | 0.97 |
| Chromium (µg)                       | 5.7 ± 1.4       | 5.8 ± 2.3       | 0.97 |
| Iodine (µg)                         | 325.3 ± 237.7   | 475.9 ± 426.1   | 0.97 |
| Magnesium (mg)                      | 206.5 ± 51.4    | 224.7 ± 69.6    | 0.97 |
| Biotin (µg)                         | 23 ± 7.8        | 27.1 ± 10.1     | 0.97 |
| Carbohydrate (g)                    | 226.3 ± 42.5    | 247.1 ± 74.4    | 0.97 |
| Salt (g)                            | 8.3 ± 3.2       | 9.5 ± 3.3       | 0.97 |
| Vitamin_K (µg)                      | 164.5 ± 76.9    | 185 ± 59.3      | 0.97 |
| Sodium (mg)                         | 3286.8 ± 1260.1 | 3763.3 ± 1298.8 | 0.97 |
| Soluble_fiber (g)                   | 2.7 ± 0.9       | 2.8 ± 0.8       | 0.97 |
| Ash (g)                             | 14 ± 4.7        | 15.4 ± 4.7      | 0.97 |
| Insoluble_fiber (g)                 | 8.2 ± 2.3       | 8.5 ± 2         | 0.97 |
| Iron (mg)                           | 6.3 ± 1.7       | 7 ± 2.6         | 0.97 |
| Niacin (mg)                         | 15.8 ± 3.1      | 12.4 ± 4.5      | 0.97 |
| Total_fiber (g)                     | 11.8 ± 3.3      | 12.8 ± 3.5      | 0.97 |
| Vitamin_B2 (mg)                     | 0.83 ± 0.41     | 1.0 ± 0.67      | 0.97 |
| Potassium (mg)                      | 1984.5 ± 522.3  | 2006.7 ± 534.6  | 0.97 |
| Vitamin_D (µg)                      | 4.4 ± 2.3       | 4.5 ± 2.5       | 0.97 |
| Retinol activity equivalent (µgRAE) | 367.1 ± 190.4   | 429.2 ± 190.8   | 0.97 |
| n6_fatty_acid (g)                   | 9.9 ± 1.8       | 9.2 ± 4.2       | 0.97 |
| Water (g)                           | 860.3 ± 277     | 856.2 ± 323.9   | 0.97 |
| Polyunsaturated_fat (g)             | 11.7 ± 2.1      | 11 ± 4.7        | 0.97 |
| Saturated_fat (g)                   | 18.7 ± 4.9      | 17.3 ± 8.5      | 0.97 |
| Vitamin_B12 (µg)                    | 4.3 ± 2.4       | 4.2 ± 1.8       | 0.97 |
| Zinc (mg)                           | 7.2 ± 1         | 6.7 ± 1.9       | 0.97 |
| Vitamin_B1 (mg)                     | 1.1 ± 0.23      | 0.91 ± 0.37     | 0.97 |
| beta_carotene (µg)                  | 2127.7 ± 1541.3 | 2377.7 ± 812.8  | 0.97 |
| Monounsaturated_fat (g)             | 22.3 ± 3.7      | 18.8 ± 9.6      | 0.97 |
| Retinol (µg)                        | 160.7 ± 110.1   | 197.1 ± 159.3   | 0.97 |
| beta_carotene equivalent (µg)       | 2455.7 ± 1730.1 | 2753.3 ± 894.5  | 0.97 |
| Vitamin_B6 (mg)                     | 1.2 ± 0.3       | 1.0 ± 0.3       | 0.97 |
| Niacin equivalent (mg)              | 27.2 ± 5        | 23 ± 7          | 0.97 |
| n3_fatty_acid (g)                   | 1.9 ± 0.5       | 1.8 ± 0.6       | 0.97 |
| Fat (g)                             | 60.7 ± 12       | 55.7 ± 25.5     | 0.97 |
| Fatty_acid (g)                      | 52.7 ± 10.1     | 47.1 ± 22.4     | 0.97 |
| Calcium (mg)                        | 407.8 ± 199.4   | 507.3 ± 260.2   | 0.97 |
| Energy (g)                          | 1814.7 ± 271.2  | 1731.2 ± 559.6  | 0.97 |
| Folate (µg)                         | 232.1 ± 73.3    | 257.4 ± 69.8    | 0.97 |
| Phosphorus (mg)                     | 865 ± 195.9     | 847.7 ± 250.2   | 0.97 |
| alpha_tocopherol (mg)               | 6.5 ± 1.4       | 6.7 ± 2.7       | 0.97 |
| Cholesterol (mg)                    | 293 ± 109.9     | 289.7 ± 135.8   | 0.97 |
| Pantothenic_acid (mg)               | 5.2 ± 1.1       | 5.0 ± 1.6       | 0.97 |
| Protein (g)                         | 63.2 ± 11.9     | 57.3 ± 16.8     | 0.98 |
| Vitamin_C (mg)                      | 69.5 ± 25.5     | 74 ± 18         | 0.98 |
| Selenium (µg)                       | 55.5 ± 15.7     | 50.6 ± 16.5     | 0.99 |

**Supplementary Table 11. Summary of the nutrient intake of healthy subjects and UC patients (Study 2).** Data represent the mean ± SD of the daily nutrient intake and *p* values with Benjamini-Hochberg correction (FDR).
